# Supplementary material for: Child Odors and Parenting: A Survey Examination of the Role of Odor in Child-Rearing
Source: PLoS One. 2016 May 3;11(5):e0154392. doi: 10.1371/journal.pone.0154392 (PMC4854394; doi:10.1371/journal.pone.0154392)
Supplement: S2 Table — (DOCX) [file pone.0154392.s004.docx]

**S2 Table Correlations among the subscales of Child Odor in Parenting scale (COPs) (n = 888)**

|  |  |  |  |  |  |  |  |  |  |  |  |  |  |  |  |  |  |  |
| --- | --- | --- | --- | --- | --- | --- | --- | --- | --- | --- | --- | --- | --- | --- | --- | --- | --- | --- |
|  | Head | | | | Forehead | | Mouth | | | | Hands | | | | Neck | | Bottom | |
|  | Aff. | | Inst. | | Aff. | | Aff. | | Inst. | | Aff. | | Inst. | | Aff. | | Inst. | |
| Head Aff. | - | |  |  |  |  |  |  |  |  |  |  |  |  |  |  |  |  |
| Head Inst. | -a | | - | |  |  |  |  |  |  |  |  |  |  |  |  |  |  |
| Forehead Aff. | .72 | *** | .42 | *** | - | |  |  |  |  |  |  |  |  |  |  |  |  |
| Mouth Aff. | .62 | *** | .42 | *** | .58 | *** | - | |  |  |  |  |  |  |  |  |  |  |
| Mouth Inst. | .43 | *** | .52 | *** | .40 | *** | -a | | - | |  |  |  |  |  |  |  |  |
| Hands Aff. | .67 | *** | .44 | *** | .67 | *** | .63 | *** | .45 | *** | - | |  |  |  |  |  |  |
| Hands Inst. | .48 | *** | .56 | *** | .45 | *** | .47 | *** | .50 | *** | -a | | - | |  |  |  |  |
| Neck | .59 | *** | .45 | *** | .66 | *** | .56 | *** | .45 | *** | .67 | *** | .50 | *** | - | |  |  |
| Bottom Inst. | .49 | *** | .42 | *** | .48 | *** | .46 | *** | .32 | *** | .48 | *** | .43 | *** | .46 | *** | - | |

Spearman's correlation coefficients are shown. ***p<.0001. A correlation within each body part is estimated using factor mixture modeling (FMM) and shown in Fig.2.
